# Supplementary material for: Cause and Effect Analysis between Influencing Factors Related to Environmental Conditions, Hunting and Handling Practices and the Initial Microbial Load of Game Carcasses
Source: MDPI journal article supplement (doi:10.3390/foods11223726), 2022-11-20
Supplement: s1 [file s1]

**Table S1.** Rate Ratios of variables identified as influencing factors of bacterial species in roe deer belly flap ( $n = 24$ ) by linear regression with backward selection with 95% confidence intervals (95% CI) and  $p$ -values. Significance levels of Rate Ratios were highlighted by stars (\* $p < 0.05$ , \*\* $p < 0.01$ , \*\*\* $p < 0.001$ )

| Influencing factor                                                | Bacterial species           | Rate Ratio | 95% CI     | $p$ -value |
|-------------------------------------------------------------------|-----------------------------|------------|------------|------------|
| Body weight after evisceration +1 kg                              | Total viable count          | 0.9        | 0.8 – 1.0  | 0.1592     |
|                                                                   | <i>E. coli</i>              | 1.1        | 1.0 – 1.2  | 0.1975     |
| Animal sex: female                                                | <i>Enterobacteriaceae</i>   | 2.0        | 0.8 – 5.2  | 0.1316     |
|                                                                   | <i>E. coli</i>              | 1.5        | 0.8 – 2.7  | 0.1941     |
| Ambient temperature on the day of hunt +10 °C                     | Total viable count          | 3.2        | 1.3 – 7.7  | 0.0128*    |
|                                                                   | <i>Pseudomonas</i> spp.     | 4.1        | 1.8 – 8.9  | 0.0013**   |
|                                                                   | <i>Enterobacteriaceae</i>   | 3.2        | 0.9 – 11.6 | 0.0747     |
|                                                                   | <i>E. coli</i>              | 1.6        | 0.6 – 4.0  | 0.2847     |
| Rain on the day of hunt: yes                                      | <i>Pseudomonas</i> spp.     | 1.6        | 0.9 – 3.0  | 0.1209     |
|                                                                   | <i>Enterobacteriaceae</i>   | 2.2        | 0.9 – 5.5  | 0.0911     |
|                                                                   | <i>E. coli</i>              | 1.9        | 0.9 – 4.0  | 0.0759     |
| Ammunition contraction: deforming                                 | <i>Enterobacteriaceae</i> * | 2.5        | 1.0 – 6.1  | 0.0467     |
|                                                                   | <i>E. coli</i> **           | 2.6        | 1.4 – 4.7  | 0.0059     |
| Damage to the gastrointestinal tract: yes                         | Total viable count          | 5.1        | 2.1 – 12.3 | 0.0011**   |
|                                                                   | <i>Pseudomonas</i> spp.     | 2.3        | 1.1 – 5.0  | 0.0332*    |
|                                                                   | <i>Lactobacillus</i> spp.   | 8.4        | 2.9 – 24.2 | 0.0004***  |
| Shooting distance +10 m                                           | <i>Enterobacteriaceae</i>   | 1.3        | 1.0 – 1.8  | 0.0324*    |
|                                                                   | <i>E. coli</i>              | 1.7        | 1.4 – 2.0  | 0.0001***  |
| Escape distance +10 m                                             | <i>Enterobacteriaceae</i>   | 0.8        | 0.6 – 1.2  | 0.2825     |
| Duration between killing and evisceration +10 min                 | <i>E. coli</i>              | 1.1        | 1.0 – 1.1  | 0.0604     |
| Evisceration: hanging                                             | <i>Enterobacteriaceae</i>   | 2.7        | 0.6 – 11.4 | 0.1692     |
|                                                                   | <i>E. coli</i>              | 12.1       | 4.6 – 31.6 | 0.0001***  |
| Evisceration: without opening pelvis                              | <i>Enterobacteriaceae</i>   | 0.5        | 0.2 – 1.5  | 0.2214     |
|                                                                   | <i>E. coli</i>              | 1.1        | 0.5 – 2.5  | 0.7271     |
| Use of gloves during evisceration: yes                            | <i>Lactobacillus</i> spp.   | 0.4        | 0.2 – 1.0  | 0.0472*    |
|                                                                   | <i>Enterobacteriaceae</i>   | 0.2        | 0.1 – 0.6  | 0.0070**   |
|                                                                   | <i>E. coli</i>              | 0.2        | 0.1 – 0.5  | 0.0015**   |
| Visible soiling of body cavity with gastrointestinal content: yes | Total viable count          | 0.5        | 0.3 – 1.1  | 0.0843     |
|                                                                   | <i>Lactobacillus</i> spp.   | 0.5        | 0.2 – 1.2  | 0.1010     |
|                                                                   | <i>E. coli</i>              | 0.5        | 0.2 – 1.0  | 0.0604     |

**Table S2.** Rate Ratios of variables identified as influencing factors of bacterial species in roe deer fillet ( $n = 23$ ) by linear regression with backward selection with 95% confidence intervals (95% CI) and  $p$ -values. Significance levels of Rate Ratios were highlighted by stars (\* $p < 0.05$ , \*\* $p < 0.01$ , \*\*\* $p < 0.001$ )

| Influencing factor                                                | Bacterial species         | Rate Ratio | 95% CI     | $p$ -value |
|-------------------------------------------------------------------|---------------------------|------------|------------|------------|
| Body weight after evisceration +1 kg                              | Total viable count        | 0.9        | 0.7 – 1.1  | 0.1618     |
|                                                                   | <i>Lactobacillus</i> spp. | 0.9        | 0.7 – 1.1  | 0.2206     |
| Animal sex: female                                                | Total viable count        | 0.6        | 0.2 – 1.4  | 0.1986     |
|                                                                   | <i>Enterobacteriaceae</i> | 2.5        | 0.7 – 8.8  | 0.1376     |
|                                                                   | <i>E. coli</i>            | 2.0        | 0.8 – 4.8  | 0.1207     |
| Ambient temperature on the day of hunt +10 °C                     | Total viable count        | 2.4        | 0.8 – 7.5  | 0.1113     |
|                                                                   | <i>Pseudomonas</i> spp.   | 3.4        | 1.5 – 7.7  | 0.0069**   |
| Rain on the day of hunt: yes                                      | <i>Lactobacillus</i> spp. | 1.8        | 0.7 – 4.5  | 0.2021     |
| Ammunition contraction: deforming                                 | <i>E. coli</i>            | 3.1        | 1.3 – 7.6  | 0.0172*    |
| Damage to the gastrointestinal tract: yes                         | Total viable count        | 3.4        | 1.1 – 10.1 | 0.0299*    |
|                                                                   | <i>Lactobacillus</i> spp. | 5.7        | 1.8 – 18.1 | 0.0056**   |
| Shooting distance +10 m                                           | Total viable count        | 1.3        | 0.9 – 1.7  | 0.1054     |
|                                                                   | <i>Pseudomonas</i> spp.   | 1.1        | 0.9 – 1.4  | 0.1769     |
|                                                                   | <i>Lactobacillus</i> spp. | 1.3        | 1.0 – 1.8  | 0.0894     |
|                                                                   | <i>Enterobacteriaceae</i> | 1.5        | 1.1 – 2.2  | 0.0156*    |
|                                                                   | <i>E. coli</i>            | 1.7        | 1.3 – 2.2  | 0.0003***  |
| Escape distance +10 m                                             | Total viable count        | 1.3        | 0.9 – 1.8  | 0.1745     |
|                                                                   | <i>Lactobacillus</i> spp. | 1.4        | 1.0 – 2.1  | 0.0769     |
| Duration between killing and evisceration +10 min                 | <i>Pseudomonas</i> spp.   | 1.0        | 0.9 – 1.0  | 0.0691     |
| Evisceration: hanging                                             | <i>Pseudomonas</i> spp.   | 1.5        | 0.5 – 4.5  | 0.4869     |
|                                                                   | <i>Enterobacteriaceae</i> | 11.4       | 1.4 – 90.1 | 0.0241**   |
|                                                                   | <i>E. coli</i>            | 10.4       | 2.4 – 44.4 | 0.0037**   |
| Evisceration: without opening pelvis                              | <i>Pseudomonas</i> spp.   | 3.2        | 1.5 – 6.6  | 0.0044**   |
|                                                                   | <i>Enterobacteriaceae</i> | 0.6        | 0.1 – 2.3  | 0.4193     |
|                                                                   | <i>E. coli</i>            | 0.7        | 0.3 – 2.0  | 0.5362     |
| Use of gloves during evisceration: yes                            | <i>Lactobacillus</i> spp. | 0.4        | 0.2 – 1.1  | 0.0858     |
|                                                                   | <i>Enterobacteriaceae</i> | 0.3        | 0.1 – 1.0  | 0.0545     |
|                                                                   | <i>E. coli</i>            | 0.3        | 0.1 – 0.9  | 0.0268*    |
| Visible soiling of body cavity with gastrointestinal content: yes | <i>E. coli</i>            | 0.6        | 0.2 – 1.4  | 0.2056     |

**Table S3.** Evaluation of the extent of failure based on the Risk Priority Number (RPN) calculated by the FMEA based on defined stepwise search. Values of O, S and D were classified based on the effects of IF on IML determined by linear regression and RRs in this study. When the classification of factors affecting IML could not be explained by the results of this study, the original research articles based on the literature search were reviewed for evidence. As a last step, when there was a lack of published evidence, classification was based on experience reported by hunters

| Step of hunting chain | Failure                                                                                                                                                                                                                                                                                                              | O | S | D | RPN |
|-----------------------|----------------------------------------------------------------------------------------------------------------------------------------------------------------------------------------------------------------------------------------------------------------------------------------------------------------------|---|---|---|-----|
| Salvage               | Game is pulled/dragged on the ground during salvage.                                                                                                                                                                                                                                                                 | 5 | 5 | 3 | 75  |
| Transport             | cross-contamination of carcasses by e.g. other animals (stacking or too close placement of several killed animals on a transport vehicle) or due to insufficient hygienic conditions of the transport vehicle (e.g. soil, leaves, blood residues from eviscerated carcasses).                                        | 3 | 3 | 4 | 36  |
| Evisceration          | Evisceration of the carcass lying on the ground (body fluids remain in the body cavity, when eviscerating the carcass lying on the ground).                                                                                                                                                                          | 5 | 5 | 1 | 25  |
| Evisceration          | Evisceration of the carcass hanging (soiling of the haunches by draining body fluids during evisceration of a carcass, which was hanging by the head).                                                                                                                                                               | 5 | 5 | 1 | 25  |
| Evisceration          | Lack of awareness of hygienic handling of game carcasses (contamination of carcass by, e.g., unwashed hands in the absence of running water or improper handling with gloves or by equipment used that has not been properly cleaned or is unsuitable for evisceration, e.g., unclean or blunt knives).              | 5 | 5 | 1 | 25  |
| Evisceration          | Contamination of the carcass (not only musculature, but also the fur) by various factors, e.g. rain, grass, leaves, surface water, etc. on the ground when the tarpaulin is not in use or when the stomach and intestinal tract of the game is damaged during evisceration and the contents contaminate the carcass. | 5 | 5 | 1 | 25  |
| Shooting/killing      | Improper shooting accuracy causes damage to the gastrointestinal tract in individual cases.                                                                                                                                                                                                                          | 4 | 5 | 1 | 20  |
| Evisceration          | The game is eviscerated in the field (compared to game handling establishment).                                                                                                                                                                                                                                      | 4 | 5 | 1 | 20  |
| Evisceration          | Slower cooling of the carcass at high outside temperatures (summer)                                                                                                                                                                                                                                                  | 3 | 5 | 1 | 15  |
| Shooting/killing      | The musculature of the game is highly destroyed due to a too high impact energy.                                                                                                                                                                                                                                     | 3 | 4 | 1 | 12  |
| Evisceration          | No or insufficient removal of e.g. hematomas, stomach and intestinal contents, adhering foreign materials (grass, leaves etc.)                                                                                                                                                                                       | 2 | 5 | 1 | 10  |
| Shooting/killing      | Insufficient killing effect is caused by insufficient impact energy.                                                                                                                                                                                                                                                 | 3 | 3 | 1 | 9   |
| Shooting/killing      | The game does not die immediately, but can still flee after the shot.                                                                                                                                                                                                                                                | 3 | 3 | 1 | 9   |
| Evisceration          | The game is eviscerated with delay.                                                                                                                                                                                                                                                                                  | 2 | 4 | 1 | 8   |

**Table S4.** Rating of probability of detection (D) for possible handling failures during game carcass obtaining based on defined stepwise search (part 1)

| Possible failure                                                                                                                                                                                                                                                                                        | Rating according to | Parameter used for rating of D                                                                                     | Rating scale of D |
|---------------------------------------------------------------------------------------------------------------------------------------------------------------------------------------------------------------------------------------------------------------------------------------------------------|---------------------|--------------------------------------------------------------------------------------------------------------------|-------------------|
| Improper shooting accuracy causes damage to the gastrointestinal tract in individual cases                                                                                                                                                                                                              | Original IML data   | Damage to gastrointestinal tract affect IML                                                                        | 1                 |
| Insufficient killing effect is caused by insufficient impact energy                                                                                                                                                                                                                                     | Original IML data   | Body weight and ammunition construction affect IML                                                                 | 1                 |
| The musculature of the game is highly destroyed due to a too high impact energy                                                                                                                                                                                                                         | Original IML data   | Body weight and ammunition construction affect IML                                                                 | 1                 |
| The game does not die immediately, but can still flee after the shot                                                                                                                                                                                                                                    | Original IML data   | Escape distance were identified as influence factor on IML                                                         | 1                 |
| The game is eviscerated in the field (compared to game handling establishment)                                                                                                                                                                                                                          | Literature research | Evisceration location, field vs. game handling establishment affect bacterial load, reported by Mirceta et al. [9] | 1                 |
| The game is eviscerated with delay                                                                                                                                                                                                                                                                      | Original IML data   | Duration between killing and evisceration affect IML                                                               | 1                 |
| Evisceration of the carcass lying on the ground (body fluids remain in the body cavity, when eviscerating the carcass lying on the ground)                                                                                                                                                              | Original IML data   | Evisceration position of the carcass affect IML                                                                    | 1                 |
| Evisceration of the carcass hanging (soiling of the haunches by draining body fluids during evisceration of a carcass, which was hanging by the head)                                                                                                                                                   | Original IML data   | Evisceration position of the carcass affect IML                                                                    | 1                 |
| Lack of awareness of hygienic handling of game carcasses (contamination of carcass by, e.g., unwashed hands in the absence of running water or improper handling with gloves or by equipment used that has not been properly cleaned or is unsuitable for evisceration, e.g., unclean or blunt knives). | Original IML data   | Gloves worn during evisceration affect IML                                                                         | 1                 |

**Table S5.** Rating of probability of detection (D) for possible handling failures during game carcass obtaining based on defined stepwise search (part 2)

| Possible failure                                                                                                                                                                                                                                                                                                     | Rating according to                    | Parameter used for rating of D                                                              | Rating scale of D |
|----------------------------------------------------------------------------------------------------------------------------------------------------------------------------------------------------------------------------------------------------------------------------------------------------------------------|----------------------------------------|---------------------------------------------------------------------------------------------|-------------------|
| Contamination of the carcass (not only musculature, but also the fur) by various factors, e.g. rain, grass, leaves, surface water, etc. on the ground when the tarpaulin is not in use or when the stomach and intestinal tract of the game is damaged during evisceration and the contents contaminate the carcass. | Original IML data                      | Rain at hunting day affect IML                                                              | 1                 |
| Slower cooling of the carcass at high outside temperatures (summer)                                                                                                                                                                                                                                                  | Original IML data                      | Ambient temperature at hunting day and duration between killing and evisceration affect IML | 1                 |
| No or insufficient removal of e.g. hematomas, stomach and intestinal contents, adhering foreign materials (grass, leaves etc.)                                                                                                                                                                                       | Original IML data                      | Visible soiling affect IML                                                                  | 1                 |
| Cross-contamination of carcasses by e.g. other animals (stacking or too close placement of several killed animals on a transport vehicle) or due to insufficient hygienic conditions of the transport vehicle (e.g. soil, leaves, blood residues from eviscerated carcasses).                                        | Experience reported by grey literature | -                                                                                           | 4                 |
